# Supplementary material
Source: Springer Nature journal article supplement (https://www.springermedizin.de/resource/supplementary/40164_2013_65_MOESM11_ESM.pdf/9687108)

**A**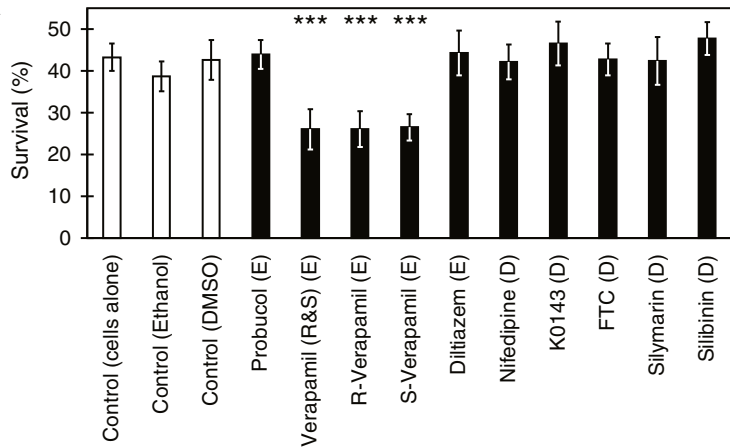**B**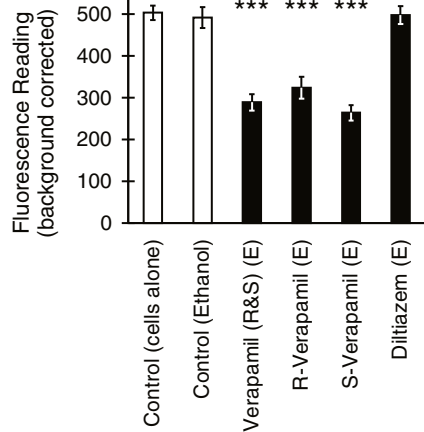**C**

|                            | Verapamil Isomer |               |
|----------------------------|------------------|---------------|
|                            | <b>S</b>         | <b>R</b>      |
| ABC Transporter Inhibition | <b>Strong</b>    | <b>Strong</b> |
| Cation Channel Inhibition  | <b>Strong</b>    | <b>Weak</b>   |

**D**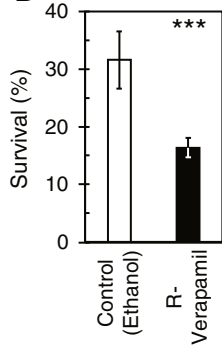**E**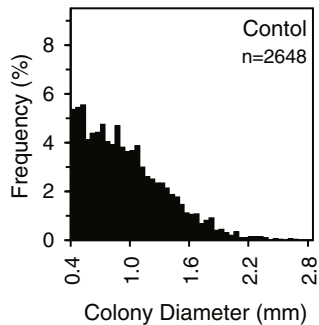**F**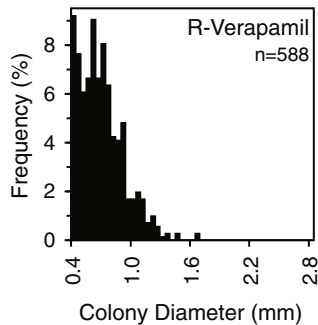

Supplement: MOESM11 [file 9687108]
